# Supplementary material
Source: publisher figshare collection journal article supplement (https://tandf.figshare.com/ndownloader/files/22297389)
Supplement: Supplementary file 1 [file 22297389]

# Geochronology and geochemistry of the Paleoproterozoic mafic dykes in the Jiaobei terrane: Implications for tectonic evolution of the Jiao-Liao-Ji Belt, eastern North China Craton

Yayun Liang1*, Jun Deng2, Xuefei Liu2, Qingfei Wang2, Yao Ma2, Tianxiang Gao2, Enquan Zhao2, Zhihui Zhou2

1 School of Civil and Resource Engineering, University of Science and Technology Beijing, Beijing 100083, China

2 State Key Laboratory of Geological Processes and Mineral Resources, China University of Geosciences, Beijing 100083, China

*Corresponding author: Yayun Liang

Contents of this file

**Supplementary Text 1:** Analytical methods

**Supplementary Table 1:** Results of LA-ICP-MS zircon U-Pb dating of the Jiaobei mafic dykes.

**Supplementary Table 2:** The composition of Rare Earth Elements (REE) of zircon of the Jiaobei mafic dykes.

**Supplementary Table 3:** Lu–Hf isotopic compositions of zircons from the Jiaobei mafic dykes.

**Supplementary Table 4:** Whole-rock geochemical compositions of the Jiaobei mafic dykes.

**Text 1: Analytical methods**

The LA-ICP-MS U–Pb dating was conducted at the Institute of Mineral Resources, Chinese Academy of Geological Sciences (Beijing). Detailed operating conditions and data reduction methods are described by Hou et al. (2009). The Argon and Helium were used to wipe out the common Pb remaining in gas path. The zircon GJ-1 was used as the external standard for zircon 206Pb/238U age (610 ±1.7 Ma, Elhlou et al., 2006). Concentrations of U, Th and Pb were measured based on zircon M127 (U= 923 ppm, Th = 439 ppm and Th/U=0.475; Nasdala et al., 2008). The software ICPMS-DataCal has been used to select off-line raw data, to analyze signals and to quantitatively calibrate for U–Pb dating (Liu et al., 2010). Concordia diagrams and weighted mean calculations were made using Isoplot/Ex ver3 (Ludwig, 2001c).

In situ zircon Hf isotopic analyses were conducted on the same spots or on the same zircon zones where U–Pb age determinations were made. Hafnium isotopic compositions were determined with a Thermo Finnigan Neptune MC-ICP-MS system coupled to a New Wave UP193 nm laser ablation system at the Laboratory of Isotope Geology, Tianjin Institute of Geology and Mineral Resources, Tianjin, China. Detailed operating conditions and data reduction methods are described by Geng et al. (2017). Isotopes, including 177Hf, 178Hf, 179Hf, 180Hf, 172Yb, 173Yb, 175Lu, 176(Hf + Yb + Lu), and 182W, were measured during the analytical process. Isobaric interference of 176Lu on 176Hf was corrected using the exponential law based on the measured 175Lu value and the recommended 176Lu/175Lu ratio of 0.02655. During the analyses, the GJ-1 and 91500 zircon standards yielded 176Hf/177Hf ratios of 0.282006 ± 22 (2ẟ, n = 10) and 0.282293 ± 15 (2ẟ, n = 10), respectively. These ratios are all consistent with the recommended 176Hf/177Hf ratios of 0.282015 ± 19 (Elhlou et al., 2006) for GJ-1 and 0.282302 ± 8 (Goolaerts et al., 2004) for 91500.

Whole-rock major and trace elements were determined at the Analytical Laboratory of the Geological Survey of China in Langfang, Hebei. Major elements were analysed through X-ray fluorescence. Trace elements were determined through inductively coupled plasma mass spectrometry. The uncertainties were less than 10%.

Whole-rock Sr and Nd isotopes were measured at Guangzhou Institute of Geochemistry, Chinese Academy of Sciences. The analytical data were obtained via Micromass Isoprobe multicollector inductively coupled plasma mass spectrometry. The analytical process is described in detail by Wei et al. (2002) and White (2000). The analytical results of the 87Sr/86Sr ratio of standard NBS987 and the 143Nd/144Nd ratio of standard Jndi-1 were 0.710266 ± 8 (2σ; n = 11) and 0.512103 ± 6 (2σ; n = 10), respectively.

**Supplementary Table 1: Results of LA-ICP-MS zircon U-Pb dating of the Jiaobei mafic dykes.**

| Sample Spot | Concentrations (ppm) | | | |  | Isotopic ratios | | | |  | Isotopic ages (Ma) | | | | | |
| --- | --- | --- | --- | --- | --- | --- | --- | --- | --- | --- | --- | --- | --- | --- | --- | --- |
| Pb | Th | U | Th/U |  | 207Pb/235U | 1σ | 206Pb/238U | 1σ |  | 207Pb/206U | 1σ | 207Pb/235U | 1σ | 206Pb/238U | 1σ |
| **QX-1** | | | | | | | | | | | | | | | | |
| QX-1-1 | 35 | 49 | 86 | 0.134 |  | 0.2073 | 0.38 | 0.0085 | 0.7430 |  | 2144.1 | 54.6 | 2100.2 | 26.6 | 2074.1 | 39.5 |
| QX-1-2 | 39 | 51 | 98 | 0.521 |  | 7.1809 | 0.23 | 0.3719 | 0.0086 |  | 2250.9 | 58.8 | 2134.1 | 28.1 | 2038.5 | 40.4 |
| QX-1-3 | 97 | 176 | 232 | 0.758 |  | 7.1109 | 0.16 | 0.3729 | 0.0063 |  | 2209.3 | 39.7 | 2125.4 | 20.5 | 2043.1 | 29.4 |
| QX-1-4 | 84 | 178 | 183 | 0.972 |  | 7.0726 | 0.15 | 0.3822 | 0.0055 |  | 2157.7 | 42.3 | 2120.6 | 19.3 | 2086.8 | 25.8 |
| QX-1-5 | 186 | 403 | 505 | 0.797 |  | 6.0841 | 0.15 | 0.3299 | 0.0059 |  | 2138.9 | 33.3 | 1988.0 | 20.9 | 1837.7 | 28.8 |
| QX-1-6 | 177 | 315 | 529 | 0.595 |  | 6.0108 | 0.17 | 0.3289 | 0.0069 |  | 2124.1 | 40.7 | 1977.4 | 24.5 | 1833.1 | 33.6 |
| QX-1-7 | 77 | 123 | 167 | 0.735 |  | 7.6712 | 0.21 | 0.4156 | 0.0087 |  | 2150.3 | 42.3 | 2193.2 | 24.6 | 2240.6 | 39.4 |
| QX-1-8 | 128 | 227 | 298 | 0.763 |  | 7.2717 | 0.15 | 0.3819 | 0.0060 |  | 2199.1 | 37.0 | 2145.3 | 18.5 | 2085.1 | 28.0 |
| QX-1-9 | 61 | 98 | 140 | 0.702 |  | 7.0735 | 0.18 | 0.3853 | 0.0064 |  | 2136.1 | 44.4 | 2120.7 | 22.3 | 2101.2 | 29.7 |
| QX-1-10 | 57 | 69 | 124 | 0.558 |  | 7.6185 | 0.19 | 0.4135 | 0.0066 |  | 2146.3 | 47.1 | 2187.0 | 22.9 | 2231.1 | 30.2 |
| QX-1-11 | 146 | 261 | 335 | 0.780 |  | 7.0841 | 0.14 | 0.3801 | 0.0052 |  | 2155.2 | 35.0 | 2122.1 | 18.1 | 2076.8 | 24.1 |
| QX-1-12 | 73 | 111 | 166 | 0.667 |  | 7.0510 | 0.14 | 0.3874 | 0.0063 |  | 2128.7 | 34.3 | 2117.9 | 17.7 | 2110.7 | 29.5 |
| QX-1-13 | 252 | 589 | 510 | 1.155 |  | 7.0186 | 0.13 | 0.3817 | 0.0051 |  | 2133.0 | 31.6 | 2113.8 | 16.2 | 2084.2 | 23.6 |
| QX-1-14 | 60 | 102 | 152 | 0.669 |  | 6.0784 | 0.16 | 0.3278 | 0.0063 |  | 2164.5 | 45.7 | 1987.2 | 22.6 | 1827.8 | 30.6 |
| QX-1-15 | 105 | 186 | 242 | 0.768 |  | 7.0610 | 0.17 | 0.3862 | 0.0067 |  | 2127.8 | 38.3 | 2119.1 | 21.1 | 2105.2 | 31.2 |
| QX-1-16 | 173 | 306 | 440 | 0.695 |  | 5.9979 | 0.11 | 0.3310 | 0.0049 |  | 2122.2 | 32.1 | 1975.5 | 15.3 | 1843.1 | 23.5 |
| QX-1-17 | 179 | 348 | 447 | 0.778 |  | 5.2117 | 0.09 | 0.2923 | 0.004 |  | 2081.2 | 22.2 | 1854.5 | 15.3 | 1653.0 | 21.5 |
| QX-1-18 | 63 | 89 | 127 | 0.703 |  | 7.4382 | 0.11 | 0.3896 | 0.005 |  | 2205.9 | 22.5 | 2165.6 | 13.9 | 2121.0 | 23.5 |
| QX-1-19 | 48 | 60 | 121 | 0.496 |  | 5.8474 | 0.09 | 0.3206 | 0.003 |  | 2121.9 | 20.8 | 1953.5 | 12.7 | 1792.7 | 16.4 |
| QX-1-20 | 63 | 89 | 133 | 0.674 |  | 6.8033 | 0.09 | 0.3703 | 0.004 |  | 2138.9 | 22.2 | 2086.2 | 12.4 | 2030.7 | 18.9 |
| QX-1-21 | 186 | 395 | 355 | 1.115 |  | 7.1811 | 0.10 | 0.3789 | 0.004 |  | 2188.6 | 20.4 | 2134.2 | 13.1 | 2071.2 | 19.6 |
| QX-1-22 | 52 | 44 | 133 | 0.329 |  | 5.9382 | 0.11 | 0.3294 | 0.005 |  | 2103.4 | 24.2 | 1966.8 | 16.5 | 1835.5 | 24.0 |
| QX-1-23 | 42 | 55 | 97 | 0.563 |  | 6.4032 | 0.11 | 0.3419 | 0.005 |  | 2175.9 | 23.2 | 2032.7 | 14.8 | 1895.7 | 23.1 |
| QX-1-24 | 269 | 354 | 827 | 0.429 |  | 4.5159 | 0.07 | 0.2652 | 0.003 |  | 2066.7 | 19.6 | 1733.9 | 12.9 | 1516.3 | 17.5 |

**Supplementary Table 2:** The composition of Rare Earth Elements (REE) of zircon of the Jiaobei mafic dykes.

| Samples | La | Ce | Pr | Nd | Sm | Eu | Gd | Tb | Dy | Ho | Er | Tm | Yb | Lu |
| --- | --- | --- | --- | --- | --- | --- | --- | --- | --- | --- | --- | --- | --- | --- |
| QX-1-1 | 1.50 | 20.04 | 0.50 | 3.46 | 2.91 | 0.37 | 5.24 | 4.92 | 55 | 20.7 | 92 | 21.1 | 216 | 31.1 |
| QX-1-2 | 8.84 | 72.11 | 3.27 | 13.23 | 4.14 | 0.39 | 10.04 | 3.50 | 40 | 15.9 | 71 | 16.7 | 167 | 25.1 |
| QX-1-3 | 0.71 | 13.42 | 0.69 | 7.80 | 9.51 | 0.79 | 14.59 | 11.75 | 141 | 48.8 | 212 | 44.1 | 432 | 62.9 |
| QX-1-4 | 1.07 | 18.88 | 0.40 | 5.55 | 9.42 | 0.89 | 15.20 | 11.52 | 131 | 44.7 | 193 | 41.4 | 398 | 58.5 |
| QX-1-5 | 1.61 | 37.67 | 1.09 | 9.92 | 15.94 | 2.25 | 18.37 | 13.72 | 158 | 56.2 | 242 | 53.7 | 532 | 77.8 |
| QX-1-6 | 10.53 | 78.63 | 4.62 | 19.89 | 12.81 | 0.93 | 22.00 | 11.45 | 133 | 47.1 | 214 | 48.4 | 491 | 73.3 |
| QX-1-7 | 0.02 | 14.36 | 0.31 | 5.62 | 7.87 | 0.69 | 11.73 | 9.78 | 114 | 39.9 | 172 | 36.3 | 356 | 54.1 |
| QX-1-8 | 1.77 | 26.66 | 0.87 | 5.42 | 5.17 | 0.53 | 11.67 | 8.55 | 106 | 37.7 | 171 | 37.3 | 373 | 55.7 |
| QX-1-9 | 0.21 | 14.44 | 0.11 | 2.16 | 3.11 | 0.60 | 7.18 | 5.91 | 75 | 26.4 | 125 | 28.3 | 298 | 47.6 |
| QX-1-10 | 0.00 | 11.57 | 0.05 | 1.12 | 1.83 | 0.14 | 3.88 | 3.90 | 50 | 18.0 | 84 | 19.4 | 207 | 32.4 |
| QX-1-11 | 0.20 | 23.90 | 0.25 | 4.38 | 7.98 | 0.34 | 14.86 | 13.09 | 154 | 56.1 | 247 | 56.0 | 542 | 80.6 |
| QX-1-12 | 0.01 | 12.64 | 0.06 | 2.20 | 5.22 | 0.29 | 10.06 | 8.88 | 108 | 37.9 | 169 | 38.3 | 379 | 56.9 |
| QX-1-13 | 2.48 | 44.55 | 1.43 | 14.19 | 15.91 | 1.04 | 25.90 | 22.51 | 269 | 92.6 | 392 | 88.4 | 863 | 122.0 |
| QX-1-14 | 1.13 | 17.11 | 0.42 | 3.65 | 6.40 | 0.46 | 10.63 | 8.81 | 107 | 38.5 | 169 | 37.5 | 377 | 53.6 |
| QX-1-15 | 0.38 | 19.50 | 0.33 | 3.08 | 5.96 | 0.35 | 9.41 | 8.23 | 107 | 38.8 | 178 | 40.3 | 402 | 57.2 |
| QX-1-16 | 7.56 | 51.20 | 2.53 | 14.75 | 9.82 | 1.36 | 13.37 | 8.05 | 97 | 34.8 | 161 | 37.1 | 383 | 55.3 |
| QX-1-17 | 0.88 | 37.48 | 0.81 | 10.20 | 13.57 | 1.25 | 53.31 | 15.16 | 165 | 53.9 | 237 | 52.6 | 498 | 76.4 |
| QX-1-18 | 0.02 | 10.34 | 0.14 | 2.62 | 5.47 | 0.54 | 29.00 | 9.02 | 104 | 37.9 | 164 | 34.8 | 318 | 51.8 |
| QX-1-19 | 0.06 | 11.33 | 0.19 | 3.27 | 4.93 | 0.56 | 22.13 | 6.53 | 74 | 26.6 | 118 | 24.8 | 228 | 40.7 |
| QX-1-20 | 0.12 | 11.10 | 0.38 | 5.53 | 7.84 | 0.93 | 33.61 | 9.99 | 112 | 40.2 | 172 | 35.0 | 309 | 55.9 |
| QX-1-21 | 4.42 | 51.97 | 2.35 | 18.35 | 13.78 | 2.21 | 49.78 | 13.91 | 165 | 60.0 | 258 | 53.8 | 485 | 83.2 |
| QX-1-22 | 0.76 | 14.09 | 0.56 | 5.80 | 3.93 | 2.67 | 12.21 | 3.72 | 47 | 19.6 | 97 | 22.1 | 231 | 51.3 |
| QX-1-23 | 0.31 | 9.13 | 0.27 | 2.84 | 3.85 | 0.49 | 17.86 | 5.60 | 66 | 24.2 | 109 | 23.5 | 213 | 40.2 |
| QX-1-24 | 1.10 | 24.03 | 0.72 | 7.58 | 12.55 | 1.60 | 35.92 | 9.36 | 106 | 40.1 | 184 | 42.9 | 430 | 72.6 |

**Supplementary Table 3: Lu–Hf isotopic compositions of zircons from the Jiaobei mafic dykes.**

| Sample | Age(Ma) | 176Lu/177Hf | 176Hf/177Hf | 2σ | εHf(0) | εHf(t) | 2σ | *t*DM1(Ma) |
| --- | --- | --- | --- | --- | --- | --- | --- | --- |
| QX-1 |  |  |  |  |  |  |  |  |
| QX-1-1 | 2251 | 0.000760 | 0.281272 | 0.000018 | -53.04 | -3.82 | 0.64 | 2743 |
| QX-1-2 | 2209 | 0.000513 | 0.281213 | 0.000018 | -55.13 | -6.49 | 0.63 | 2805 |
| QX-1-3 | 2158 | 0.000759 | 0.281249 | 0.000015 | -53.86 | -6.73 | 0.53 | 2774 |
| QX-1-4 | 2150 | 0.000879 | 0.281206 | 0.000016 | -55.39 | -8.61 | 0.57 | 2842 |
| QX-1-5 | 2272 | 0.000417 | 0.281212 | 0.000017 | -55.15 | -4.95 | 0.62 | 2799 |
| QX-1-6 | 2199 | 0.001218 | 0.281221 | 0.000018 | -54.84 | -7.48 | 0.65 | 2846 |
| QX-1-7 | 2136 | 0.000754 | 0.281197 | 0.000016 | -55.72 | -9.07 | 0.56 | 2845 |
| QX-1-9 | 2146 | 0.000499 | 0.281206 | 0.000026 | -55.39 | -8.15 | 0.91 | 2814 |
| QX-1-11 | 2155 | 0.000943 | 0.281188 | 0.000022 | -56.01 | -9.22 | 0.79 | 2870 |
| QX-1-12 | 2129 | 0.000552 | 0.281247 | 0.000025 | -53.94 | -7.16 | 0.88 | 2762 |
| QX-1-13 | 2133 | 0.000741 | 0.281288 | 0.000026 | -52.48 | -5.88 | 0.91 | 2720 |
| QX-1-14 | 2128 | 0.000492 | 0.281241 | 0.000022 | -54.13 | -7.29 | 0.78 | 2766 |
| QX-1-15 | 2095 | 0.000640 | 0.281352 | 0.000027 | -50.23 | -4.33 | 0.97 | 2627 |
| QX-1-16 | 2081 | 0.001784 | 0.281370 | 0.000018 | -49.59 | -6 | 1.17 | 2682 |
| QX-1-17 | 2056 | 0.001164 | 0.281291 | 0.000018 | -52.37 | -8 | 1.12 | 2746 |
| QX-1-18 | 2206 | 0.000558 | 0.281195 | 0.000021 | -55.76 | -7 | 1.26 | 2832 |
| QX-1-19 | 2122 | 0.000669 | 0.281245 | 0.000017 | -54.00 | -8 | 1.11 | 2773 |
| QX-1-20 | 2139 | 0.000818 | 0.281266 | 0.000021 | -53.26 | -7 | 1.25 | 2755 |
| QX-1-21 | 2189 | 0.000806 | 0.281227 | 0.000019 | -54.63 | -7 | 1.12 | 2807 |
| QX-1-22 | 2103 | 0.001101 | 0.281250 | 0.000024 | -53.82 | -8 | 1.38 | 2797 |
| QX-1-23 | 2176 | 0.000575 | 0.281205 | 0.000019 | -55.43 | -8 | 1.24 | 2821 |
| QX-1-24 | 2067 | 0.001806 | 0.281317 | 0.000024 | -51.46 | -8 | 1.23 | 2757 |

**Supplementary Table 4:** Whole-rock geochemical compositions of the Jiaobei mafic dykes.

| Sample | QX-1 | |  | QX-2 | | |  | QX-3 | | Standards | Detection limit |
| --- | --- | --- | --- | --- | --- | --- | --- | --- | --- | --- | --- |
| QX-1-1 | QX-1-2 |  | QX-2-1 | QX-2-2 | QX-2-3 |  | QX-3 | QX-3 | BHVO-2 |
| SiO2 | 53.77 | 52.89 |  | 49.69 | 52.02 | 50.13 |  | 54.77 | 55.15 | 49.72 | 0.1 |
| TiO2 | 0.31 | 0.38 |  | 0.72 | 0.68 | 0.72 |  | 0.88 | 0.86 | 2.76 | 0.05 |
| Al2O3 | 13.00 | 13.07 |  | 12.58 | 12.03 | 12.56 |  | 12.21 | 12.05 | 13.44 | 0.1 |
| TFe2O3 | 10.08 | 10.63 |  | 13.97 | 13.06 | 13.77 |  | 12.25 | 12.12 | 12.4 | 0.1 |
| MnO | 0.15 | 0.17 |  | 0.19 | 0.21 | 0.20 |  | 0.17 | 0.18 | 0.17 | 0.05 |
| MgO | 8.80 | 9.02 |  | 9.49 | 8.37 | 8.80 |  | 7.32 | 7.29 | 7.23 | 0.05 |
| CaO | 9.30 | 9.27 |  | 9.85 | 9.54 | 9.95 |  | 8.72 | 8.87 | 11.24 | 0.05 |
| Na2O | 2.59 | 2.67 |  | 2.77 | 2.73 | 2.81 |  | 2.42 | 2.33 | 2.22 | 0.05 |
| K2O | 1.03 | 1.01 |  | 0.83 | 0.98 | 0.86 |  | 0.66 | 0.63 | 0.52 | 0.05 |
| P2O5 | 0.04 | 0.04 |  | 0.08 | 0.07 | 0.07 |  | 0.14 | 0.13 | 0.27 | 0.05 |
| LOI | 1.61 | 1.52 |  | 0.75 | 1.13 | 1.08 |  | 1.03 | 0.96 | 0 | 0.1 |
| Total | 99.83 | 99.82 |  | 99.82 | 99.79 | 99.79 |  | 99.79 | 99.77 | 99.97 |  |
| Mg# | 61 | 60 |  | 55 | 53 | 53 |  | 52 | 52 |  |  |
| Li | 16.26 | 15.97 |  | 17.02 | 14.97 | 19.81 |  | 7.31 | 7.65 | 4.7 | 1 |
| Be | 0.24 | 0.27 |  | 0.47 | 1.13 | 0.35 |  | 0.51 | 0.49 | 1.06 | 0.2 |
| Sc | 42.06 | 46.29 |  | 52.1 | 50.13 | 51.71 |  | 42.34 | 43.15 | 31.88 | 1 |
| V | 189.3 | 230.5 |  | 312.4 | 279.4 | 285.1 |  | 264.7 | 264 | 323 | 5 |
| Cr | 95 | 81.8 |  | 124.6 | 86.7 | 124.8 |  | 45.8 | 44.3 | 287.8 | 5 |
| Co | 48.84 | 51.99 |  | 59.13 | 55.4 | 58.23 |  | 46.19 | 47.4 | 44.91 | 1 |
| Ni | 98.82 | 103.4 |  | 64.82 | 57.14 | 63.57 |  | 35.69 | 38.28 | 127.12 | 2 |
| Cu | 10.68 | 18.09 |  | 83.86 | 57.16 | 114.77 |  | 55.66 | 52.20 | 128.98 | 1 |
| Zn | 68.16 | 70.56 |  | 91.22 | 92.3 | 88.71 |  | 106.1 | 114 | 109.6 | 2 |
| Ga | 11.78 | 12.4 |  | 17.99 | 17.18 | 17.2 |  | 18.99 | 18.62 | 22.32 | 2 |
| Rb | 51.9 | 48.9 |  | 17.7 | 28.2 | 24.7 |  | 17.5 | 15.6 | 9.47 | 5 |
| Sr | 103.9 | 136.5 |  | 146.8 | 143.4 | 149.5 |  | 171.7 | 197.4 | 405 | 5 |
| Y | 11.33 | 12.02 |  | 23.12 | 22.49 | 23.77 |  | 24.69 | 25.62 | 26.99 | 1 |
| Zr | 21.00 | 24.90 |  | 45.20 | 51.20 | 43.90 |  | 90.00 | 87.80 | 173 | 2 |
| Nb | 2.27 | 2.99 |  | 1.69 | 2.69 | 1.83 |  | 4.72 | 4.63 | 18.64 | 2 |
| Mo | 0.19 | 0.16 |  | 0.18 | 0.43 | 0.15 |  | 0.28 | 0.23 |  | 0.2 |
| Cd | 69.57 | 66.86 |  | 147.66 | 145.62 | 148.60 |  | 144.35 | 111.06 |  | 0.02 |
| In | 0.03 | 0.04 |  | 0.06 | 0.06 | 0.05 |  | 0.06 | 0.06 |  | 0.02 |
| Cs | 0.73 | 0.83 |  | 0.24 | 0.31 | 0.28 |  | 0.46 | 0.30 | 0.1 | 1 |
| Ba | 88.60 | 104.60 |  | 64.10 | 114.50 | 90.80 |  | 222.10 | 195.20 | 133 | 5 |
| La | 5.93 | 4.25 |  | 2.91 | 5.78 | 3.23 |  | 10.35 | 9.60 | 15.74 | 1 |
| Ce | 12.16 | 8.60 |  | 7.11 | 12.29 | 7.54 |  | 21.52 | 20.42 | 38.11 | 1 |
| Pr | 1.45 | 1.11 |  | 1.05 | 1.70 | 1.13 |  | 3.01 | 2.92 | 5.36 | 0.1 |
| Nd | 5.52 | 4.50 |  | 5.43 | 7.55 | 5.67 |  | 12.96 | 12.81 | 24.96 | 0.1 |
| Sm | 1.21 | 1.15 |  | 1.90 | 2.12 | 1.99 |  | 3.24 | 3.25 | 6.18 | 0.1 |
| Eu | 0.40 | 0.40 |  | 0.77 | 0.77 | 0.88 |  | 1.11 | 1.16 | 2.1 | 0.1 |
| Gd | 1.44 | 1.40 |  | 2.61 | 2.74 | 2.73 |  | 3.68 | 3.73 | 6.42 | 0.1 |
| Tb | 0.28 | 0.28 |  | 0.56 | 0.55 | 0.58 |  | 0.68 | 0.70 | 0.98 | 0.1 |
| Dy | 1.83 | 1.93 |  | 3.88 | 3.72 | 4.03 |  | 4.34 | 4.50 | 5.54 | 0.1 |
| Ho | 0.39 | 0.41 |  | 0.82 | 0.80 | 0.85 |  | 0.88 | 0.92 | 1 | 0.1 |
| Er | 1.19 | 1.25 |  | 2.40 | 2.35 | 2.47 |  | 2.57 | 2.67 | 2.64 | 0.1 |
| Tm | 0.19 | 0.21 |  | 0.37 | 0.37 | 0.40 |  | 0.40 | 0.40 | 0.35 | 0.1 |
| Yb | 1.31 | 1.46 |  | 2.59 | 2.50 | 2.60 |  | 2.58 | 2.67 | 2.1 | 0.1 |
| Lu | 0.23 | 0.25 |  | 0.44 | 0.44 | 0.43 |  | 0.45 | 0.46 | 0.29 | 0.1 |
| Hf | 0.87 | 1.00 |  | 1.92 | 2.33 | 1.96 |  | 3.31 | 3.01 | 4.49 | 0.2 |
| Ta | 0.24 | 0.22 |  | 0.12 | 0.19 | 0.12 |  | 0.32 | 0.31 | 1.17 | 0.1 |
| Pb | 2.22 | 2.36 |  | 3.58 | 3.78 | 3.29 |  | 3.88 | 3.58 | 0.04 | 2 |
| Bi | 0.21 | 0.23 |  | 0.18 | 0.50 | 0.19 |  | 0.06 | 0.05 | 1.52 | 0.05 |
| Th | 1.56 | 0.82 |  | 0.91 | 0.94 | 0.92 |  | 1.40 | 1.35 | 1.28 | 1 |
| U | 0.37 | 0.33 |  | 0.31 | 0.30 | 0.30 |  | 0.28 | 0.26 | 0.42 | 0.2 |
| 87Rb/86Sr | 1.118621 | 1.033886 |  |  |  |  |  | 0.294147 | 0.228073 |  |  |
| 87Sr/86Sr | 0.731900 | 0.731773 |  |  |  |  |  | 0.710044 | 0.710047 |  |  |
| 1δ | 0.000007 | 0.000007 |  |  |  |  |  | 0.000006 | 0.000009 |  |  |
| (87Sr/86Sr)i | 0.698040 | 0.700478 |  |  |  |  |  | 0.701141 | 0.703143 |  |  |
| 147Sm/144Nd | 0.133005 | 0.153942 |  |  |  |  |  | 0.151130 | 0.153238 |  |  |
| 143Nd/144Nd | 0.511701 | 0.511979 |  |  |  |  |  | 0.511980 | 0.512032 |  |  |
| 1δ | 0.000005 | 0.000005 |  |  |  |  |  | 0.000005 | 0.000004 |  |  |
| (143Nd/144Nd)i | 0.509862 | 0.509850 |  |  |  |  |  | 0.509890 | 0.509913 |  |  |
| εNd(t) | -1.10 | -1.32 |  |  |  |  |  | -0.54 | -0.09 |  |  |
| TDM1 | 2722 | 2967 |  |  |  |  |  | 2832 | 2801 |  |  |

Mg# = 100* molar Mg/(Mg +∑Fe).
